# Supplementary material for: Temperamental Change in Adolescence and Its Predictive Role on Anxious Symptomatology
Source: MDPI journal article supplement (doi:10.3390/bs12060194), 2022-06-16
Supplement: s1 [file s1]

## Article

# Temperamental Change in Adolescence and its Predictive Role on Anxious Symptomatology

**Supplementary Materials:** The following are available online at [www.mdpi.com/xxx/s1](http://www.mdpi.com/xxx/s1), Table S1: Parameters on the multigroup growth model (configural model).

|                            | Boys     |       |       |      | Girls    |       |        |      |
|----------------------------|----------|-------|-------|------|----------|-------|--------|------|
|                            | Estimate | SE    | z     | p    | Estimate | SE    | Z      | p    |
| Regressor on Anxiety score |          |       |       |      |          |       |        |      |
| BIS latent intercept       | 2.68     | 0.66  | 4.09  | 0.00 | 3.15     | 0.64  | 4.95   | 0.00 |
| AC latent intercept        | -4.22    | 3.15  | -1.34 | 0.18 | -7.10    | 5.45  | -1.30  | 0.19 |
| BIS latent slope           | 3.45     | 3.57  | 0.97  | 0.34 | 10.34    | 3.41  | 3.03   | 0.00 |
| AC latent slope            | -28.01   | 58.84 | -0.48 | 0.63 | -1.17    | 32.96 | -0.04  | 0.97 |
| Covariance                 |          |       |       |      |          |       |        |      |
| BIS latent intercept ~~    |          |       |       |      |          |       |        |      |
| BIS latent slope           | -0.79    | 0.36  | -2.17 | 0.03 | -0.56    | 0.32  | -1.75  | 0.08 |
| AC latent intercept        | -0.34    | 0.19  | -1.76 | 0.08 | -0.66    | 0.13  | -5.04  | 0.00 |
| AC latent slope            | -0.02    | 0.06  | -0.30 | 0.76 | 0.06     | 0.05  | 1.35   | 0.18 |
| BIS latent slope ~~        |          |       |       |      |          |       |        |      |
| AC latent intercept        | 0.08     | 0.07  | 1.11  | 0.27 | 0.09     | 0.05  | 1.82   | 0.07 |
| AC latent slope            | -0.03    | 0.02  | -1.30 | 0.19 | -0.04    | 0.02  | -2.35  | 0.02 |
| AC latent intercept ~~     |          |       |       |      |          |       |        |      |
| AC latent slope            | -0.01    | 0.02  | -0.79 | 0.43 | 0.00     | 0.01  | 0.26   | 0.79 |
| Intercept                  |          |       |       |      |          |       |        |      |
| Anxiety score              | 27.46    | 15.77 | 1.74  | 0.08 | 41.90    | 29.67 | 1.41   | 0.16 |
| BIS latent intercept       | 5.88     | 0.30  | 19.38 | 0.00 | 7.29     | 0.24  | 30.12  | 0.00 |
| BIS latent slope           | -0.26    | 0.11  | -2.29 | 0.02 | -0.49    | 0.08  | -5.81  | 0.00 |
| AC latent intercept        | 4.47     | 0.06  | 78.63 | 0.00 | 4.53     | 0.04  | 116.58 | 0.00 |
| AC latent slope            | 0.00     | 0.02  | -0.08 | 0.93 | 0.01     | 0.01  | 0.50   | 0.62 |
| Variance                   |          |       |       |      |          |       |        |      |
| BIS T1                     | 1.95     | 0.86  | 2.26  | 0.02 | 3.35     | 0.72  | 4.64   | 0.00 |
| BIS T2                     | 4.16     | 0.70  | 5.90  | 0.00 | 3.56     | 0.62  | 5.73   | 0.00 |
| BIS T3                     | 4.77     | 1.40  | 3.40  | 0.00 | 3.75     | 0.52  | 7.17   | 0.00 |
| BIS T4                     | 2.30     | 0.83  | 2.78  | 0.01 | 3.03     | 0.89  | 3.41   | 0.00 |
| BIS T1                     | 0.21     | 0.05  | 4.39  | 0.00 | 0.15     | 0.02  | 6.28   | 0.00 |
| BIS T2                     | 0.22     | 0.04  | 5.35  | 0.00 | 0.12     | 0.02  | 6.85   | 0.00 |
| BIS T3                     | 0.10     | 0.02  | 5.12  | 0.00 | 0.13     | 0.02  | 6.56   | 0.00 |
| BIS T4                     | 0.11     | 0.03  | 4.10  | 0.00 | 0.11     | 0.03  | 4.48   | 0.00 |
| Anxiety score              | 127.23   | 22.76 | 5.59  | 0.00 | 132.40   | 18.72 | 7.07   | 0.00 |
| BIS latent intercept       | 7.46     | 1.09  | 6.85  | 0.00 | 8.61     | 1.05  | 8.21   | 0.00 |
| BIS latent slope           | 0.65     | 0.20  | 3.32  | 0.00 | 0.66     | 0.18  | 3.62   | 0.00 |
| AC latent intercept        | 0.21     | 0.05  | 4.11  | 0.00 | 0.19     | 0.03  | 7.13   | 0.00 |
| AC latent slope            | 0.01     | 0.01  | 0.87  | 0.38 | 0.01     | 0.01  | 1.89   | 0.06 |

Note. Observable variable loadings and intercepts are fixed due to specification of the latent growth model.

BIS = Behavioral inhibition system. AC = Attentional control. SE = Standard error of the estimate.
